# Supplementary material for: Photoperiod response-related gene SiCOL1 contributes to flowering in sesame
Source: PubMed Central journal article supplement (PMC6288898; doi:10.1186/s12870-018-1583-z), 2018-12-10
Supplement: 12870_2018_1583_MOESM1_ESM.pdf [file 12870_2018_1583_MOESM1_ESM.pdf]

## **Photoperiod response-related gene *SiCOL1* contributes to flowering in sesame**

Rong Zhou<sup>1</sup>, Pan Liu<sup>1</sup>, Donghua Li<sup>1</sup>, Xiurong Zhang<sup>1\*</sup>, Xin Wei<sup>1,2\*</sup>

<sup>1</sup>Key Laboratory of Biology and Genetic Improvement of Oil Crops of the Ministry of Agriculture, Oil Crops Research Institute of the Chinese Academy of Agricultural Sciences, Wuhan, 430062, China

<sup>2</sup>College of Life Sciences, Shanghai Normal University, Shanghai, 200234, China

\*Correspondence: xwei@shnu.edu.cn (XW) and zhangxr@oilcrops.cn (XZ)

### **Supplementary Figures**

**Figure S1** Phylogenetic relationships and structures of SiCOL proteins.

**Figure S2** Comparison of SiCOL1, SiCOL2 and CO protein sequences.

**Figure S3** Relative expression of *FT* in leaves of T<sub>2</sub> transgenic *Arabidopsis* lines with overexpressed *SiCOL1* and *SiCOL2*.

**Figure S4** Relative expression of *SiCOL2* in different tissues and development stages of sesame.

**Figure S5** Relative diurnal expression of *SiCOL2* under LD and SD conditions.

**Figure S6** Nucleotide changes in the coding region of *SiCOL2* among cultivated sesame.

**Figure S7** Sequences of *SiCOL1* in ten sesame landraces.

**Figure S8** Haplotype network of *SiCOL2*.

### **Supplementary Tables**

**Table S1** Information of B-box gene family and CCT-containing gene family in sesame genome.

**Table S2** Days to flowering of *Arabidopsis* samples.

**Table S3** Information of the sesame landraces from Asia used in the present study.

**Table S4** Primers used in the qRT-PCR.

## Supplementary Figures

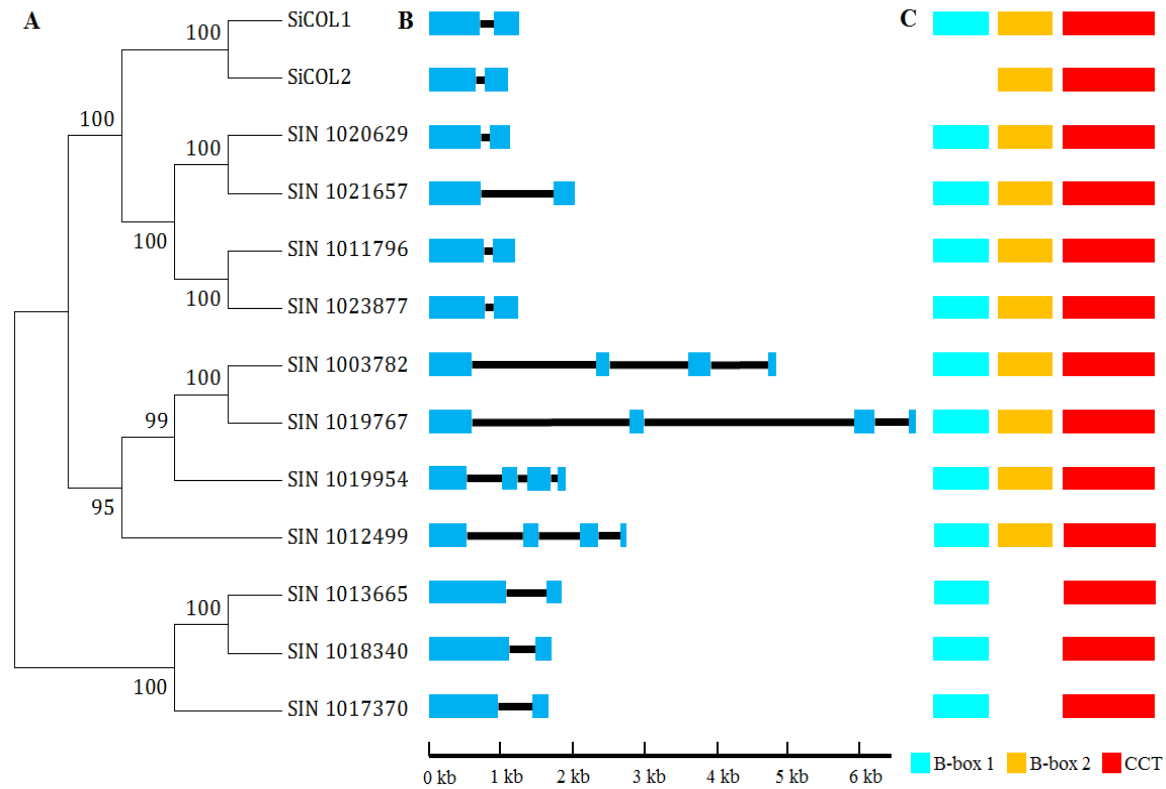

**Figure S1 Phylogenetic relationships and structures of SiCOL proteins.** **A** A NJ phylogenetic tree of the SiCOL proteins. Bootstrap values from 1,000 replicates are shown in the nodes. **B** The gene structure of *SiCOLs*. Blue boxes and black lines were exon and intron regions, respectively. **C** The domain structure of SiCOL proteins. Colorful boxes indicated B-box 1, B-box 2 and CCT domain, respectively.

|        |                                                                      |                                        |           |
|--------|----------------------------------------------------------------------|----------------------------------------|-----------|
| SiCOL1 | MLKLQNSPMKHGGAARSTWPRG                                               | CDTCRSAASAVYCRTHLAYLCTSCDTRIHADNHLSPRH | 60        |
| SiCOL2 | MLKVENSGNDPPGGARYNW                                                  | -----LSSRR                             | 24        |
| CO     | MLKQES---NDIGSGENNRAR                                                | CDTCRSNACTVYCHADSAYLCMSCDAQVHSANRVASRH | 57        |
|        | *** :. :. *... .                                                     | B-box1 motif                           | :. *:     |
|        |                                                                      |                                        |           |
| SiCOL1 | ERVVVCEACESSPAALICKADSASLCSACDADIHSANPLARRHHRVPI                     | LPIPG-TLYGPS                           | 119       |
| SiCOL2 | QPFWLCEACERAPAAFLCKADAASLCAACDSDIHSANPLARRHHRVPI                     | PQVFN-TLYGPS                           | 83        |
| CO     | KRRVVCESKERAPAAFLCEADDASLCTACDSEVHSANPLARRHQRVPI                     | LPISGNSFSSMT                           | 117       |
|        | : . :***:** :***:**:** *****:**:*****:**:*****:**:*****              | B-box2 motif                           | :. :. :.. |
|        |                                                                      |                                        |           |
| SiCOL1 | -----AANADGVIVRRSMDEEADEDEDEEAASWLLYNPTIKNGDEDQSNDDNGRAS             | 170                                    |           |
| SiCOL2 | APGLITGPAAGDAEEEFQTQEADETVDGEDEDEEAASWLLNPKVNGDNQSHDNGPTAAL          | 142                                    |           |
| CO     | TTHHQSEKTMTPDKRLVVDQEEGEGDKDAKEVASWLFPS-----DKNNNNQNGLL-             | 171                                    |           |
|        | : :. :. :. : : . : * . * . * . * . * . * . * . * . * . * . * . * . * |                                        | : :. :. : |
|        |                                                                      |                                        |           |
| SiCOL1 | FGGEADEYLALDYNSQCNNQFNNGYSINQQQPC-----QSFP-QRSYCSDS--                | 216                                    |           |
| SiCOL2 | FGGTMDEYLDLDDYNSCNSQFNEHFT-NQQQHY-----SDSVVPTQYQVKVDC--              | 190                                    |           |
| CO     | FS---DEYLNLDYNSSMYKFTGEYSQHQQN---CSVPQTSYGGDRVVPLKLEESRGHQ           | 226                                    |           |
|        | *. **** * ***, : :*, :. :***: . * :. .                               |                                        |           |
|        |                                                                      |                                        |           |
| SiCOL1 | -----VVIPIPP-AYSYPASISQTVLPLMDHVGGVPEPATSEVSVSQTRPPKGTI              | 265                                    |           |
| SiCOL2 | ----FQLGLEVEVSNTAYSYPNSMSHNVSLSLSPMD-VGVVPESTMTEISISHQRPPKGTI        | 244                                    |           |
| CO     | HNQQNFQFNIKYGSSGTHYNDNGSINHAYISSME-TGVVPESTACVTTASHPRTPKGTV          | 285                                    |           |
|        | . * . * : : . . :. * : * * * . : : * : * . * . * . * . *             |                                        |           |
|        |                                                                      |                                        |           |
| SiCOL1 | ELFSGPPVQIP--TQLSPTDREARVRLRYREKKKNRKFEKTI                           | RYASRKAYAETRPRIKGRF                    | 323       |
| SiCOL2 | DLFSGPPIQVP--TQLTPMDREARVRLRYREKKKTRKFEKTI                           | RYASRKAYAETRPRIKGRF                    | 302       |
| CO     | EQQPDPAQMITVITQLSPMDREARVRLRYREKTRKFEKTI                             | RYASRKAYAEIRPVNGRF                     | 345       |
|        | : ..* . * : ***:* *****:**:*****:**:*****:**:*****                   | CCT-domain                             |           |
|        |                                                                      |                                        |           |
| SiCOL1 | AKRSGDAEAEVDQLFSTSLVSESAFVPSF                                        | 354                                    |           |
| SiCOL2 | AKRK-DVGVEVEQMFAPLMGESEYGIVPSF                                       | 332                                    |           |
| CO     | AKRE--IEAE-EQGFNTMLMYNTGYGIVPSF                                      | 373                                    |           |
|        | ***. . * : * * : * : :. :. :****                                     |                                        |           |

**Figure S2 Comparison of SiCOL1, SiCOL2 and CO protein sequences.** The B-box motifs and CCT domain were indicated. ‘\*’ indicates positions which have a single, fully conserved residue. ‘.’ and ‘.’ indicate strong and weak groups are fully conserved, respectively. These are all the positively scoring groups that occur in the Gonnet Pam250 matrix [79]. The strong and weak groups are defined as strong score > 0.5 and weak score ≤ 0.5, respectively.

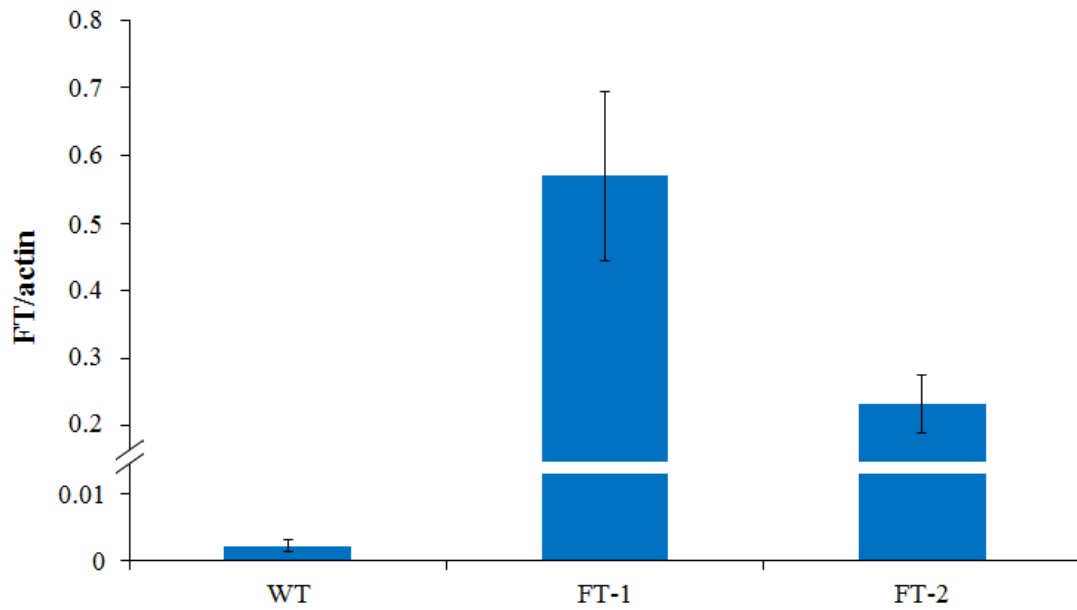

**Figure S3** Relative expression of *FT* in leaves of *T*<sub>2</sub> transgenic *Arabidopsis* lines with overexpressed *SiCOL1* and *SiCOL2*. FT-1 and FT-2 indicate the *FT* in *T*<sub>2</sub> transgenic *Arabidopsis* lines with overexpressed *SiCOL1* and *SiCOL2*, respectively. Transcript abundance was quantified using qRT-PCR and expression levels were normalized using *actin* as a reference gene. The bar indicates standard deviation.

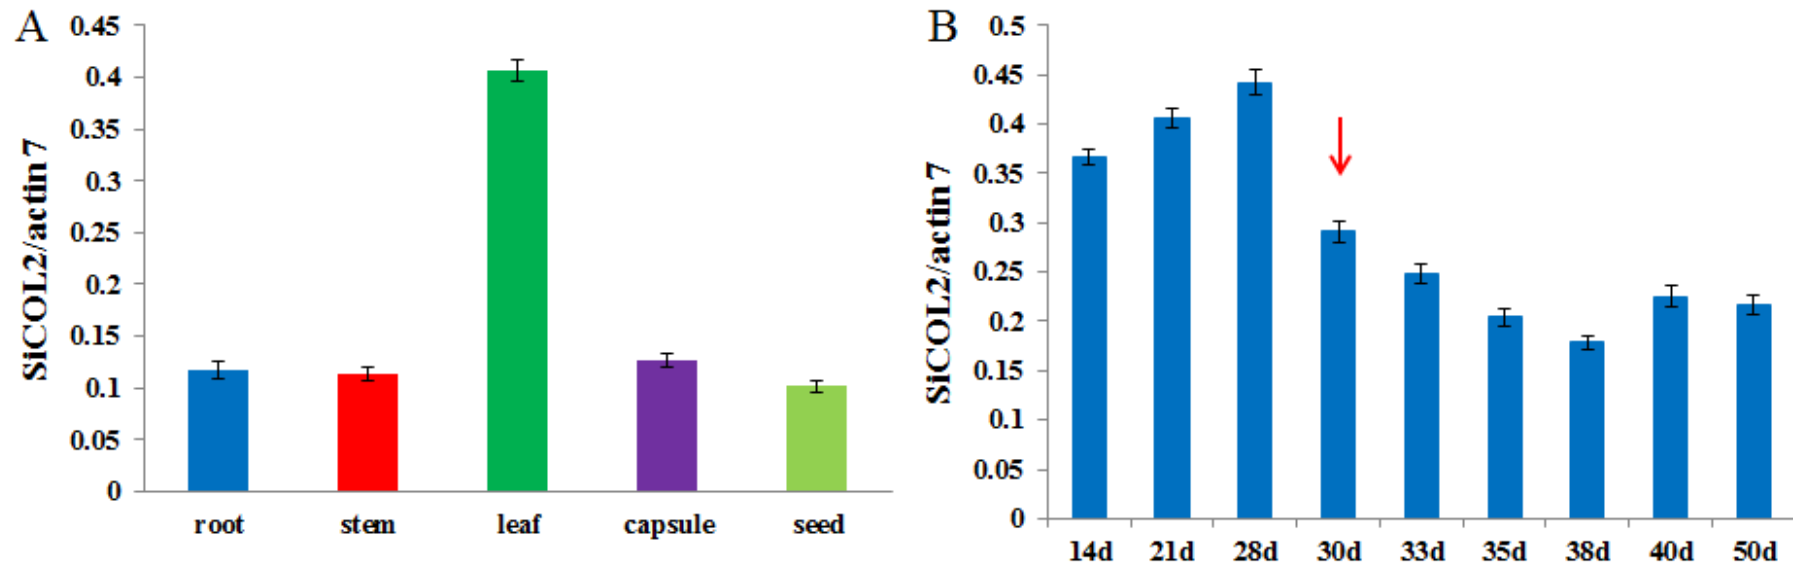

**Figure S4 Relative expression of *SiCOL2* in different tissues and development stages of sesame.** **A** Relative expression of *SiCOL2* in five tissues of sesame. **B** Relative expression of *SiCOL2* in leaves of different development stages. The red throw indicates that tiny flower buds begin to appear in the axil of sesame plants. Transcript abundance was quantified using qRT-PCR and expression levels were normalized using sesame *actin7* as a reference gene. The bar indicates standard deviation.

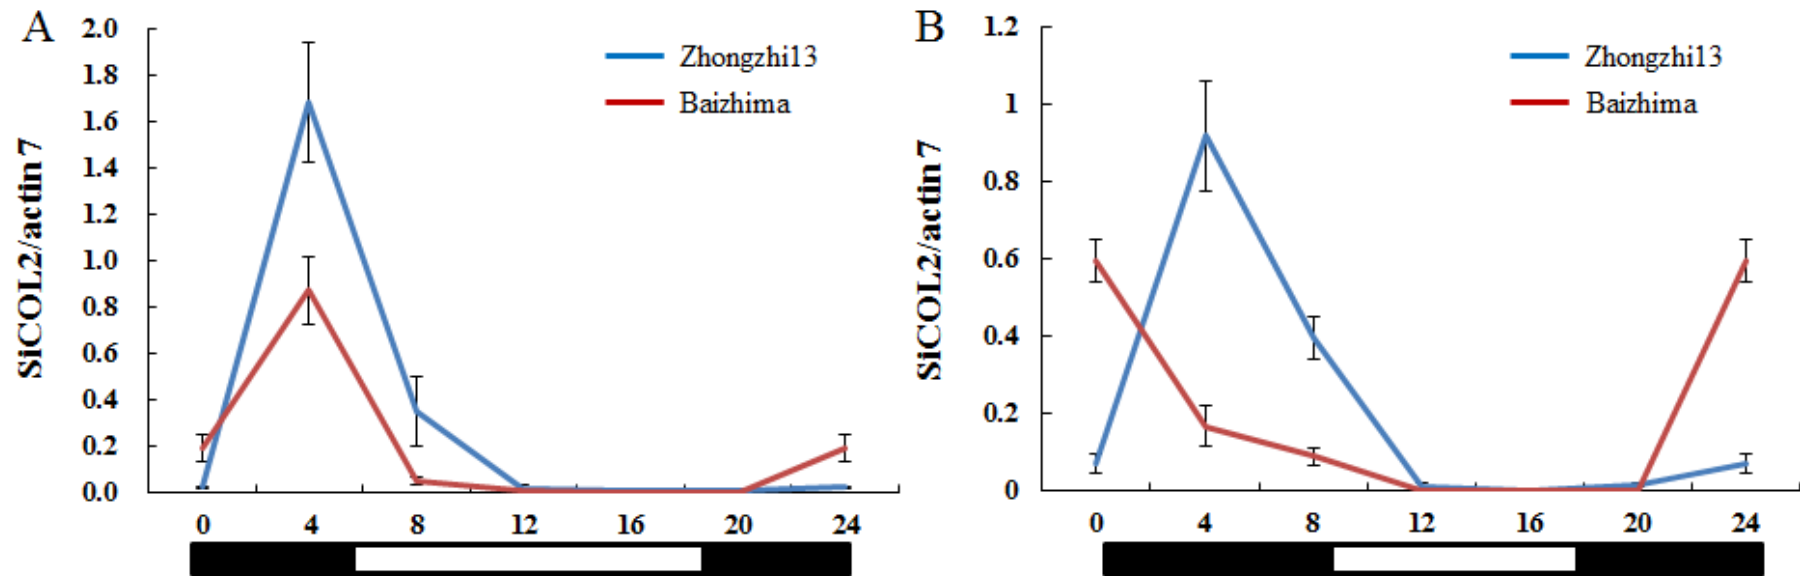

**Figure S5 Relative diurnal expression of *SiCOL2* under LD and SD conditions. A** Relative expression of *SiCOL2* under LD condition. **B** Relative expression of *SiCOL2* under SD condition. White boxes below the graphs indicate light periods and dark boxes indicate darkness. The expression data was normalized by sesame *actin7*. The bar indicates standard deviation.

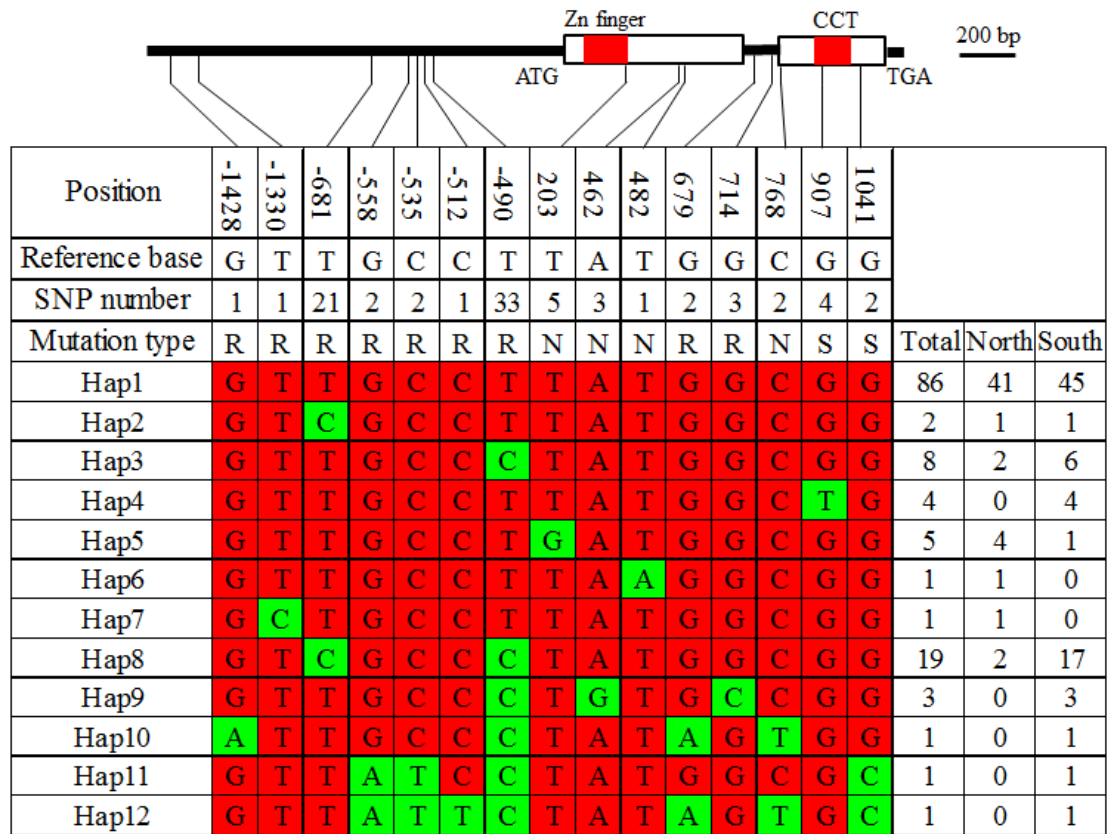

**Figure S6 Nucleotide changes in the coding region of *SiCOL2* among cultivated sesame.** Reference base is the base in reference genome ‘Zhongzhi13’. SNP number is the mutation number among the 132 landraces. R, S and N in mutation type indicate replacement, synonymous SNP and nonsynonymous SNP, respectively. Numbers in the right column are numbers of cultivars represented in every haplotypes. Total, South and North indicate total landraces, landraces from south group and landraces from north group, respectively. Variations that different from the reference bases are shown in green.



|      |   |   |   |   |   |   |   |   |   |   |   |   |   |   |   |   |   |   |   |   |   |   |   |   |   |   |   |   |   |   |   |   |   |   |   |   |   |   |   |   |   |
|------|---|---|---|---|---|---|---|---|---|---|---|---|---|---|---|---|---|---|---|---|---|---|---|---|---|---|---|---|---|---|---|---|---|---|---|---|---|---|---|---|---|
| S012 | G | A | A | G | C | T | G | A | G | G | A | T | G | A | G | G | A | T | G | A | G | G | A | T | G | A | A | G | C | A | G | C | T | T | C | A | T | G | G |   |   |
| S016 | G | A | A | G | C | T | G | A | G | G | A | T | G | A | G | G | A | T | G | A | G | G | A | T | G | A | A | G | C | A | G | C | T | T | C | A | T | G | G |   |   |
| S060 | G | A | A | G | C | T | G | A | G | G | A | T | G | A | G | G | A | T | G | A | G | G | A | T | G | A | A | G | C | A | G | C | T | T | C | A | T | G | G |   |   |
| S062 | G | A | A | G | C | T | G | A | G | G | A | T | G | A | G | G | A | T | G | A | G | G | A | T | G | A | A | G | C | A | G | C | T | T | C | A | T | G | G |   |   |
| S075 | G | A | A | G | C | T | G | A | G | G | A | T | G | A | G | G | A | T | G | A | G | G | A | T | G | A | A | G | C | A | G | C | T | T | C | A | T | G | G |   |   |
| S050 | G | A | A | G | C | T | G | A | G | G | A | T | G | A | G | G | A | T | - | - | - | - | - | - | - | - | G | A | A | G | C | A | G | C | T | T | C | A | T | G | G |
| S053 | G | A | A | G | C | T | G | A | G | G | A | T | G | A | G | G | A | T | - | - | - | - | - | - | - | - | G | A | A | G | C | A | G | C | T | T | C | A | T | G | G |
| S054 | G | A | A | G | C | T | G | A | G | G | A | T | G | A | G | G | A | T | - | - | - | - | - | - | - | - | G | A | A | G | C | A | G | C | T | T | C | A | T | G | G |
| S057 | G | A | A | G | C | T | G | A | G | G | A | T | G | A | G | G | A | T | - | - | - | - | - | - | - | - | G | A | A | G | C | A | G | C | T | T | C | A | T | G | G |
| S115 | G | A | A | G | C | T | G | A | G | G | A | T | G | A | G | G | A | T | - | - | - | - | - | - | - | - | G | A | A | G | C | A | G | C | T | T | C | A | T | G | G |

**Figure S7 Sequences of *SiCOL1* in ten sesame landraces.** The 6 bp deletion was found in the sequences of landraces with Hap15. The detailed information of the landraces was available at Table S3.

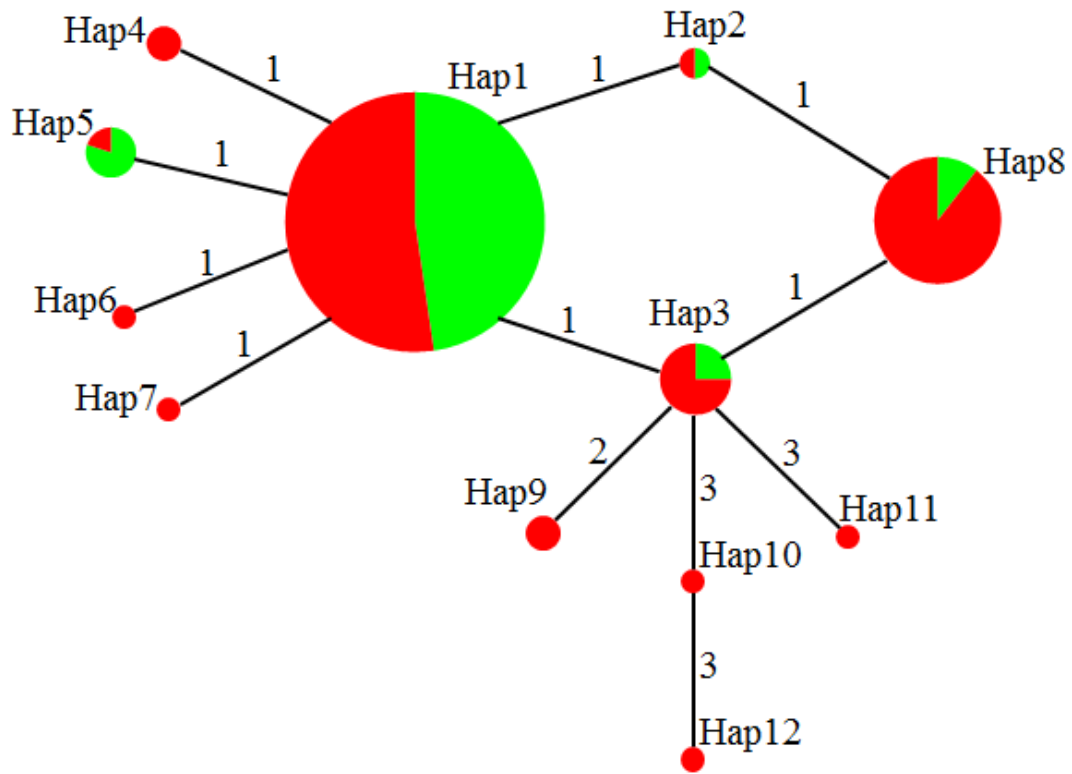

**Figure S8 Haplotype network of *SiCOL2*.** Haplotypes are showed by colored solid circles. Circle size is proportional to the quantity of samples within a given haplotype. Lines between haplotypes represent mutational steps between alleles. The numbers next to the lines indicate the nucleotide difference existed between the linked haplotypes. The red and blue color indicates landraces from south group and north group, respectively.

## Supplementary Tables

**Table S1 Information of B-box gene family and CCT-containing gene family in sesame genome.**

| <b>ID</b> | <b>Gene</b> | <b>E-value</b> | <b>Score</b> | <b>Number</b> | <b>LG</b>     | <b>Position</b>   |
|-----------|-------------|----------------|--------------|---------------|---------------|-------------------|
| B-box1    | SIN_1000235 | 4.70E-09       | 36.8         | 2             | scaffold00498 | 508-8648          |
| B-box2    | SIN_1001371 | 2.00E-06       | 28.4         | 3             | LG12          | 3725144-3725923   |
| B-box3    | SIN_1001451 | 0.0034         | 18.1         | 2             | scaffold00165 | 24583-26061       |
| B-box4    | SIN_1002219 | 0.00064        | 20.4         | 2             | LG3           | 3248013-3249699   |
| B-box5    | SIN_1003782 | 1.30E-08       | 35.5         | 2             | LG16          | 4171550-4176377   |
| B-box6    | SIN_1004479 | 0.0019         | 18.9         | 2             | LG11          | 12834357-12835660 |
| B-box7    | SIN_1004520 | 9.60E-14       | 51.8         | 2             | LG10          | 16533928-16535789 |
| B-box8    | SIN_1004896 | 3.30E-07       | 30.9         | 1             | LG15          | 2534501-2535610   |
| B-box9    | SIN_1009097 | 1.10E-12       | 48.4         | 2             | LG3           | 23443287-23444467 |
| B-box10   | SIN_1011537 | 5.00E-13       | 49.5         | 2             | LG7           | 3254481-3255641   |
| B-box11   | SIN_1011796 | 3.60E-10       | 40.4         | 2             | LG5           | 17536289-17537482 |
| B-box12   | SIN_1012499 | 1.20E-09       | 38.8         | 3             | LG6           | 1093823-1096564   |
| B-box13   | SIN_1013522 | 0.00064        | 20.4         | 1             | LG5           | 5718885-5729717   |
| B-box14   | SIN_1013665 | 6.20E-09       | 36.5         | 1             | LG1           | 10021319-10023171 |
| B-box15   | SIN_1014520 | 6.60E-07       | 30           | 3             | LG12          | 247769-248701     |
| B-box16   | SIN_1014730 | 5.00E-13       | 49.5         | 2             | LG8           | 20586653-20588389 |
| B-box17   | SIN_1014743 | 2.10E-16       | 60.3         | 3             | LG8           | 20489435-20490511 |
| B-box18   | SIN_1015960 | 6.30E-12       | 46           | 3             | LG3           | 18348540-18351621 |
| B-box19   | SIN_1016011 | 0.0052         | 17.5         | 2             | LG5           | 8155957-8157602   |
| B-box20   | SIN_1016901 | 3.20E-05       | 24.6         | 3             | LG16          | 1466366-1466815   |
| B-box21   | SIN_1017370 | 1.00E-07       | 32.5         | 1             | LG3           | 11310021-11311664 |
| B-box22   | SIN_1017513 | 2.30E-06       | 28.2         | 2             | LG3           | 9802259-9802930   |

|         |             |          |      |   |      |                   |
|---------|-------------|----------|------|---|------|-------------------|
| B-box23 | SIN_1018340 | 1.70E-08 | 35   | 1 | LG2  | 16108396-16110105 |
| B-box24 | SIN_1019210 | 5.80E-13 | 49.3 | 2 | LG10 | 5985140-5987670   |
| B-box25 | SIN_1019417 | 6.10E-13 | 49.3 | 2 | LG14 | 3894339-3897686   |
| B-box26 | SIN_1019767 | 1.30E-07 | 32.2 | 2 | LG8  | 1838327-1845107   |
| B-box27 | SIN_1019889 | 3.30E-09 | 37.3 | 2 | LG8  | 2936072-2937312   |
| B-box28 | SIN_1019954 | 0.0028   | 18.4 | 2 | LG5  | 13943158-13945055 |
| B-box29 | SIN_1019960 | 4.70E-06 | 27.2 | 1 | LG5  | 14074758-14075066 |
| B-box30 | SIN_1019994 | 0.0083   | 16.8 | 3 | LG5  | 14864233-14865050 |
| B-box31 | SIN_1020140 | 0.0016   | 19.1 | 1 | LG5  | 16847867-16854721 |
| B-box32 | SIN_1020629 | 3.00E-13 | 50.2 | 2 | LG6  | 18213252-18214375 |
| B-box33 | SIN_1020739 | 0.0006   | 20.5 | 1 | LG6  | 17458017-17461708 |
| B-box34 | SIN_1021657 | 1.50E-13 | 51.2 | 2 | LG1  | 930153-932165     |
| B-box35 | SIN_1022519 | 5.60E-10 | 39.8 | 2 | LG6  | 22132686-22135112 |
| B-box36 | SIN_1023739 | 0.0024   | 18.5 | 1 | LG2  | 11013816-11019898 |
| B-box37 | SIN_1023877 | 8.70E-13 | 48.8 | 2 | LG2  | 9655751-9656982   |
| CCT1    | SIN_1002800 | 5.10E-18 | 65.4 | 1 | LG10 | 2646228-2649123   |
| CCT2    | SIN_1003172 | 4.70E-17 | 62.3 | 1 | LG14 | 18264-20779       |
| CCT3    | SIN_1003782 | 4.60E-16 | 59.2 | 1 | LG16 | 4171550-4176377   |
| CCT4    | SIN_1004027 | 1.50E-18 | 67.2 | 1 | LG13 | 3405604-3408756   |
| CCT5    | SIN_1004233 | 1.70E-10 | 41.4 | 2 | LG15 | 1426384-1427703   |
| CCT6    | SIN_1004896 | 1.80E-17 | 63.7 | 1 | LG15 | 2534501-2535610   |
| CCT7    | SIN_1005900 | 4.30E-17 | 62.5 | 1 | LG4  | 8619497-8624397   |
| CCT8    | SIN_1005989 | 7.60E-14 | 52.1 | 1 | LG8  | 15096112-15104658 |
| CCT9    | SIN_1006875 | 5.90E-17 | 62.1 | 1 | LG12 | 2589677-2592703   |
| CCT10   | SIN_1007726 | 2.60E-05 | 24.8 | 1 | LG5  | 2074223-2076532   |
| CCT11   | SIN_1009194 | 0.00078  | 20   | 2 | LG7  | 9062162-9064884   |

|       |             |          |      |   |      |                   |
|-------|-------------|----------|------|---|------|-------------------|
| CCT12 | SIN_1009237 | 2.40E-17 | 63.3 | 1 | LG7  | 9348457-9352056   |
| CCT13 | SIN_1011285 | 2.30E-16 | 60.2 | 1 | LG11 | 13633366-13639025 |
| CCT14 | SIN_1011796 | 2.00E-18 | 66.7 | 1 | LG5  | 17536289-17537482 |
| CCT15 | SIN_1012499 | 1.70E-16 | 60.6 | 1 | LG6  | 1093823-1096564   |
| CCT16 | SIN_1013665 | 1.30E-17 | 64.2 | 1 | LG1  | 10021319-10023171 |
| CCT17 | SIN_1014239 | 3.40E-17 | 62.8 | 1 | LG12 | 2075343-2076486   |
| CCT18 | SIN_1014633 | 1.80E-13 | 50.9 | 1 | LG8  | 21100088-21100747 |
| CCT19 | SIN_1015297 | 7.30E-16 | 58.5 | 1 | LG3  | 16730565-16737598 |
| CCT20 | SIN_1015513 | 1.90E-18 | 66.8 | 1 | LG6  | 8148404-8150002   |
| CCT21 | SIN_1016429 | 1.50E-17 | 64   | 2 | LG4  | 9154308-9156996   |
| CCT22 | SIN_1017370 | 4.70E-18 | 65.5 | 1 | LG3  | 11310021-11311664 |
| CCT23 | SIN_1017486 | 1.80E-15 | 57.3 | 1 | LG3  | 9994680-10000625  |
| CCT24 | SIN_1017911 | 4.30E-19 | 68.9 | 1 | LG1  | 7804119-7805369   |
| CCT25 | SIN_1018340 | 5.60E-18 | 65.3 | 1 | LG2  | 16108396-16110105 |
| CCT26 | SIN_1019767 | 2.00E-16 | 60.4 | 1 | LG8  | 1838327-1845107   |
| CCT27 | SIN_1019889 | 9.00E-18 | 64.7 | 1 | LG8  | 2936072-2937312   |
| CCT28 | SIN_1019954 | 1.30E-16 | 61   | 1 | LG5  | 13943158-13945055 |
| CCT29 | SIN_1020629 | 5.80E-18 | 65.3 | 1 | LG6  | 18213252-18214375 |
| CCT30 | SIN_1021657 | 5.50E-18 | 65.3 | 1 | LG1  | 930153-932165     |
| CCT31 | SIN_1023877 | 4.60E-18 | 65.6 | 1 | LG2  | 9655751-9656982   |
| CCT32 | SIN_1024178 | 6.40E-12 | 45.9 | 1 | LG9  | 4998282-4999672   |
| CCT33 | SIN_1024493 | 1.70E-18 | 67   | 1 | LG9  | 2745883-2747059   |
| CCT34 | SIN_1026120 | 8.90E-16 | 58.3 | 1 | LG10 | 15054383-15058219 |
| CCT35 | SIN_1026121 | 1.50E-15 | 57.5 | 1 | LG10 | 15061838-15067703 |
| CCT36 | SIN_1026433 | 8.00E-17 | 61.6 | 1 | LG8  | 13223513-13226854 |

---

**Table S2 Days to flowering of *Arabidopsis* samples.**

| <i>Arabidopsis</i><br>samples | Days to flowering (d) |        |        |        |        |        |        |        |        |         |
|-------------------------------|-----------------------|--------|--------|--------|--------|--------|--------|--------|--------|---------|
|                               | line 1                | line 2 | line 3 | line 4 | line 5 | line 6 | line 7 | line 8 | line 9 | line 10 |
| <i>35S::SiCOL1</i>            | 29                    | 27     | 25     | 28     | 30     | 26     | 25     | 25     | 29     | 30      |
|                               | 27                    | 26     | 30     | 30     | 28     | 29     | 28     | 27     | 28     | 29      |
|                               | 30                    | 26     | 27     | 28     | 30     | 28     | 27     | 28     | 28     | 31      |
|                               | 31                    | 27     | 29     | 26     | 32     | 29     | 28     | 26     | 31     | 28      |
|                               | 28                    | 27     | 28     | 28     | 28     | 28     | 26     | 25     | 28     | 27      |
|                               | 26                    | 28     | 26     | 27     | 27     | 25     | 28     | 28     | 30     | 28      |
|                               | 28                    | 29     | 28     | 28     | 32     | 29     | 29     | 26     | 28     | 29      |
|                               | 26                    | 30     | 27     | 28     | 31     | 26     | 28     | 29     | 28     | 31      |
|                               | 32                    | 27     | 26     | 27     | 29     | 28     | 25     | 27     | 29     | 29      |
|                               | 29                    | 26     | 27     | 28     | 29     | 24     | 29     | 28     | 26     | 28      |
| <i>35S::SiCOL2</i>            | 28                    | 31     | 27     | 29     | 29     | 30     | 32     | 29     | 32     | 34      |
|                               | 27                    | 32     | 29     | 31     | 31     | 31     | 29     | 28     | 30     | 30      |
|                               | 27                    | 29     | 27     | 28     | 32     | 30     | 29     | 31     | 30     | 31      |
|                               | 30                    | 30     | 29     | 30     | 31     | 31     | 30     | 25     | 28     | 31      |
|                               | 28                    | 31     | 28     | 27     | 33     | 28     | 31     | 27     | 30     | 32      |
|                               | 31                    | 30     | 30     | 30     | 31     | 29     | 30     | 30     | 29     | 30      |
|                               | 28                    | 33     | 28     | 31     | 30     | 31     | 31     | 29     | 30     | 33      |
|                               | 32                    | 30     | 28     | 30     | 29     | 32     | 32     | 26     | 31     | 29      |
|                               | 30                    | 32     | 30     | 31     | 30     | 30     | 29     | 29     | 30     | 32      |
|                               | 27                    | 30     | 29     | 30     | 32     | 31     | 32     | 27     | 31     | 30      |
| empty vector                  | 31                    | 34     | 33     | 30     | 36     | 38     | 32     | 32     | 35     | 37      |
|                               | 34                    | 33     | 35     | 31     | 37     | 35     | 33     | 33     | 37     | 35      |
|                               | 33                    | 35     | 31     | 30     | 33     | 36     | 34     | 31     | 36     | 38      |

|       |    |    |    |    |    |    |    |    |    |    |
|-------|----|----|----|----|----|----|----|----|----|----|
|       | 32 | 36 | 32 | 31 | 36 | 34 | 31 | 33 | 33 | 33 |
|       | 33 | 32 | 33 | 33 | 36 | 37 | 33 | 35 | 37 | 39 |
|       | 30 | 34 | 31 | 31 | 35 | 33 | 31 | 33 | 33 | 34 |
|       | 33 | 33 | 33 | 34 | 33 | 34 | 35 | 34 | 35 | 32 |
|       | 31 | 34 | 32 | 30 | 34 | 33 | 32 | 33 | 32 | 34 |
|       | 33 | 35 | 33 | 32 | 33 | 32 | 33 | 31 | 31 | 36 |
|       | 32 | 31 | 32 | 31 | 32 | 34 | 31 | 33 | 33 | 33 |
| Col-0 | 31 | 32 | 34 | 32 | 34 | 35 | 31 | 33 | 33 | 35 |

Ten individuals of ten T<sub>2</sub> lines of *35S::SiCOL1*, *35S::SiCOL2* and empty vector as well as ten Col-0 individuals were grown in LD condition and the flowering time of each individual was recorded. The days to flowering was measured as the number of days from sowing to the appearance of flower buds in the center of the plant rosette.

**Table S3 Information of the sesame landraces from Asia used in the present study.**

| ID    | Name        | Origin      | Longitude(°) | Latitude(°) | Group | Flowering date (d) |      |      | SiCOL1 | SiCOL2 |
|-------|-------------|-------------|--------------|-------------|-------|--------------------|------|------|--------|--------|
|       |             |             |              |             |       | 2015               | 2016 | 2017 | hap    | hap    |
| S001  | 726         | Afghanistan | 69.10E       | 34.31N      | North | 48                 | 55   | 56   | 6      | 8      |
| S002  | 725         | Afghanistan | 69.10E       | 34.31N      | North | 46                 | 56   | 46   | 6      | 8      |
| S003  | 835-1       | Bangladesh  | 90.24E       | 23.42N      | South | 52                 | 51   | 56   | 1      | 1      |
| S004  | Ses-11      | Bangladesh  | 90.24E       | 23.42N      | South | 52                 | 55   | 55   | 1      | 1      |
| S005  | Ses-12      | Bangladesh  | 90.24E       | 23.42N      | South | 40                 | 46   | 43   | 4      | 8      |
| S006  | Heizhima    | Bangladesh  | 90.24E       | 23.42N      | South | 47                 | 43   | 52   | 10     | 8      |
| S007  | ZM11-17     | Burma       | 96.09E       | 16.48N      | South | 47                 | 51   | 50   | 1      | 1      |
| S008  | ZM11-18     | Burma       | 96.09E       | 16.48N      | South | 52                 | 51   | 51   | 1      | 1      |
| S009  | Tha Dun Byu | Burma       | 96.06E       | 19.45N      | South | 48                 | 54   | 52   | 14     | 1      |
| S010  | Potepye     | Burma       | 96.06E       | 19.45N      | South | 42                 | 54   | 44   | 2      | 1      |
| S011  | Patiae-1    | Burma       | 96.50E       | 21.58N      | South | 44                 | 55   | 46   | 1      | 1      |
| S012* | Magwe 719   | Burma       | 96.50E       | 21.58N      | South | 48                 | 54   | 47   | 1      | 4      |
| S013  | Maeshae     | Burma       | 95.39E       | 19.08N      | South | 48                 | 52   | 47   | 3      | 1      |
| S014  | Sinyadanar  | Burma       | 95.39E       | 19.08N      | South | 58                 | 61   | 56   | 1      | 4      |
| S015  | Potepye     | Burma       | 95.39E       | 19.08N      | South | 46                 | 53   | 47   | 15     | 8      |
| S016* | Heizhima    | Burma       | 96.09E       | 16.48N      | South | 59                 | 54   | 57   | 1      | 3      |
| S017  | Baicao      | China       | 114.90E      | 33.44N      | North | 39                 | 48   | 41   | 15     | 1      |
| S018  | Tanma       | China       | 113.69E      | 31.26N      | South | 42                 | 48   | 47   | 15     | 1      |
| S019  | Zhima       | China       | 89.18E       | 42.94N      | North | 36                 | 40   | 37   | 14     | 1      |
| S020  | Zhima       | China       | 89.18E       | 42.94N      | North | 39                 | 38   | 40   | 15     | 1      |
| S021  | Hezhima     | China       | 109.89E      | 31.08N      | South | 40                 | 44   | 42   | 14     | 1      |
| S022  | Heizhima    | China       | 105.38E      | 31.23N      | South | 51                 | 55   | 48   | 1      | 1      |
| S023  | Zhima       | China       | 116.35E      | 23.54N      | South | 52                 | 53   | 48   | 6      | 1      |



|      |                  |       |         |        |       |    |    |    |    |   |
|------|------------------|-------|---------|--------|-------|----|----|----|----|---|
| S024 | Zhima            | China | 121.65E | 42.01N | North | 36 | 42 | 41 | 15 | 1 |
| S025 | Jiaopanzhima     | China | 111.78E | 37.14N | North | 37 | 43 | 41 | 15 | 1 |
| S026 | Laozhima         | China | 110.68E | 31.75N | South | 47 | 52 | 48 | 15 | 1 |
| S027 | Qingchunheizhima | China | 121.37E | 31.11N | South | 42 | 46 | 48 | 6  | 1 |
| S028 | Liujiabaizhima   | China | 121.37E | 31.11N | South | 53 | 53 | 48 | 1  | 1 |
| S029 | Huizhima         | China | 106.10E | 25.17N | South | 44 | 50 | 49 | 1  | 1 |
| S030 | Huangzhima       | China | 106.85E | 22.35N | South | 46 | 53 | 51 | 6  | 1 |
| S031 | Heizhima         | China | 109.27E | 22.69N | South | 46 | 56 | 50 | 6  | 1 |
| S032 | Baizhima         | China | 109.84E | 19.05N | South | 53 | 64 | 57 | 1  | 1 |
| S033 | Zhima            | China | 113.81E | 36.07N | North | 48 | 53 | 47 | 15 | 1 |
| S034 | Sitongzhima      | China | 113.35E | 34.51N | North | 43 | 55 | 50 | 15 | 1 |
| S035 | Baizhima         | China | 113.96E | 35.05N | North | 40 | 42 | 42 | 14 | 1 |
| S036 | Yingshangzhima   | China | 116.25E | 32.64N | North | 46 | 50 | 44 | 14 | 1 |
| S037 | Zhima            | China | 109.29E | 37.96N | North | 50 | 55 | 54 | 15 | 1 |
| S038 | Hongzhima        | China | 106.16E | 33.33N | North | 39 | 52 | 44 | 15 | 1 |
| S039 | Heizhima         | China | 115.21E | 29.83N | South | 49 | 54 | 47 | 1  | 2 |
| S040 | Beisanxie        | China | 111.32E | 30.77N | South | 59 | 61 | 55 | 1  | 1 |
| S041 | Zhima            | China | 116.55E | 29.90N | South | 45 | 54 | 45 | 1  | 1 |
| S042 | Zhima            | China | 120.83E | 37.30N | North | 40 | 50 | 46 | 15 | 1 |
| S043 | Bacha            | China | 123.49E | 43.51N | North | 39 | 35 | 32 | 15 | 1 |
| S044 | Huangzhima       | China | 108.12E | 28.26N | South | 50 | 55 | 54 | 1  | 1 |
| S045 | Bawangbian       | China | 117.06E | 39.38N | North | 38 | 41 | 43 | 15 | 1 |
| S046 | Zhima            | China | 115.02E | 37.21N | North | 41 | 46 | 44 | 15 | 1 |
| S047 | Laohongzhima     | China | 111.48E | 33.14N | North | 37 | 53 | 42 | 15 | 1 |
| S048 | Yeersan          | China | 114.63E | 32.96N | North | 38 | 46 | 44 | 15 | 1 |
| S049 | Baizhima         | China | 125.08E | 45.51N | North | 27 | 33 | 32 | 14 | 1 |

|       |                   |       |         |        |       |    |    |    |    |   |
|-------|-------------------|-------|---------|--------|-------|----|----|----|----|---|
| S050* | Bacha             | China | 122.77E | 45.34N | North | 32 | 35 | 36 | 15 | 1 |
| S051  | Deleilei          | China | 119.42E | 32.39N | North | 41 | 40 | 42 | 15 | 1 |
| S052  | Zhima             | China | 95.26E  | 25.22N | South | 44 | 53 | 48 | 15 | 1 |
| S053* | Xinyangbaizhima   | China | 120.26E | 33.77N | North | 47 | 50 | 46 | 15 | 1 |
| S054* | Baizhima          | China | 120.14E | 33.39N | North | 41 | 46 | 44 | 15 | 2 |
| S055  | Baizhima          | China | 119.57E | 31.75N | South | 44 | 46 | 44 | 15 | 1 |
| S056  | Heizhima          | China | 120.46E | 33.20N | North | 44 | 51 | 51 | 6  | 5 |
| S057* | Chama             | China | 121.08E | 32.09N | North | 41 | 46 | 43 | 15 | 1 |
| S058  | Baizhima          | China | 116.09E | 25.09N | South | 42 | 49 | 46 | 1  | 1 |
| S059  | Heizhima          | China | 118.14E | 24.74N | South | 41 | 44 | 42 | 1  | 1 |
| S060* | Heizhima          | China | 117.60E | 26.22N | South | 41 | 42 | 43 | 1  | 1 |
| S061  | Zhima             | China | 100.56E | 25.48N | South | 48 | 55 | 54 | 1  | 1 |
| S062* | Tainanheixuan2hao | China | 120.31E | 23.31N | South | 52 | 65 | 57 | 1  | 1 |
| S063  | Zhima             | China | 122.07E | 46.06N | North | 35 | 40 | 43 | 15 | 1 |
| S064  | Baizhima          | China | 109.84E | 19.05N | South | 65 | 56 | 71 | 1  | 3 |
| S065  | C-50              | India | 72.12E  | 26.20N | South | 65 | 71 | 55 | 13 | 1 |
| S066  | Ty-13             | India | 71.09E  | 23.14N | South | 62 | 67 | 57 | 1  | 1 |
| S067  | Phule til 1       | India | 73.42E  | 22.43N | South | 54 | 68 | 55 | 1  | 1 |
| S068  | Gouri             | India | 76.02E  | 23.17N | South | 48 | 57 | 48 | 15 | 1 |
| S069  | Methila           | India | 79.19E  | 28.10N | South | 48 | 53 | 46 | 1  | 1 |
| S070  | Hnan-ni           | India | 77.22E  | 24.34N | South | 44 | 54 | 46 | 9  | 1 |
| S071  | Sinya Dana-2      | India | 75.58E  | 21.06N | South | 52 | 59 | 55 | 1  | 1 |
| S072  | Sinya Dana-3      | India | 75.58E  | 21.06N | South | 46 | 55 | 54 | 8  | 8 |
| S073  | EC—343404         | India | 77.32E  | 10.27N | South | 42 | 53 | 47 | 6  | 8 |
| S074  | EC—342783         | India | 81.34E  | 17.20N | South | 53 | 61 | 55 | 1  | 8 |
| S075* | EC—355640         | India | 87.31E  | 22.55N | South | 40 | 41 | 43 | 1  | 8 |

|      |                     |             |         |        |       |    |    |    |    |    |
|------|---------------------|-------------|---------|--------|-------|----|----|----|----|----|
| S076 | EC—355666           | India       | 84.02E  | 20.46N | South | 40 | 45 | 46 | 1  | 8  |
| S077 | EC—357315           | India       | 89.28E  | 26.29N | South | 55 | 61 | 60 | 1  | 8  |
| S078 | TC-25               | India       | 71.34E  | 26.11N | South | 54 | 62 | 55 | 1  | 8  |
| S079 | 865                 | India       | 69.50E  | 23.42N | South | 53 | 76 | 56 | 5  | 12 |
| S080 | 874                 | India       | 75.02E  | 27.06N | South | 58 | 53 | 63 | 1  | 8  |
| S081 | 891                 | India       | 72.38E  | 26.33N | South | 45 | 62 | 46 | 11 | 8  |
| S082 | 847                 | India       | 72.29E  | 25.56N | South | 48 | 53 | 47 | 12 | 3  |
| S083 | 10(27)              | Japan       | 136.50E | 35.12N | North | 47 | 53 | 48 | 14 | 1  |
| S084 | 110(1)              | Japan       | 136.50E | 35.12N | North | 48 | 56 | 52 | 15 | 6  |
| S085 | TKV-334(22)         | Japan       | 136.50E | 35.12N | North | 40 | 46 | 45 | 14 | 1  |
| S086 | 723(38)             | Japan       | 136.50E | 35.12N | North | 43 | 49 | 47 | 14 | 5  |
| S087 | 323(4)              | Japan       | 136.50E | 35.12N | North | 39 | 41 | 44 | 15 | 1  |
| S088 | 384(7)              | Japan       | 136.50E | 35.12N | North | 50 | 47 | 46 | 15 | 1  |
| S089 | 342(5)              | Japan       | 136.50E | 35.12N | North | 48 | 55 | 47 | 15 | 1  |
| S090 | TKV-726(16)         | Japan       | 136.50E | 35.12N | North | 52 | 55 | 47 | 15 | 5  |
| S091 | 301(3)              | Japan       | 136.50E | 35.12N | North | 43 | 37 | 44 | 15 | 1  |
| S092 | Sursari Kall Til-20 | Nepal       | 85.19E  | 27.42N | South | 58 | 59 | 59 | 6  | 1  |
| S093 | 697                 | Nepal       | 85.19E  | 27.42N | South | 70 | 91 | 76 | 1  | 8  |
| S094 | 1018                | Pakistan    | 73.04E  | 31.25N | South | 48 | 54 | 46 | 15 | 8  |
| S095 | 1139                | Pakistan    | 72.56E  | 33.30N | South | 53 | 71 | 56 | 16 | 3  |
| S096 | 1131                | Pakistan    | 73.04E  | 31.25N | North | 51 | 75 | 47 | 7  | 3  |
| S097 | His-173             | Philippines | 120.35E | 17.20N | South | 48 | 55 | 55 | 1  | 1  |
| S098 | His-167             | Philippines | 120.35E | 17.20N | South | 50 | 53 | 46 | 15 | 1  |
| S099 | Isi-12              | Philippines | 120.17E | 15.54N | South | 73 | 87 | 68 | 12 | 1  |
| S100 | His-167             | Philippines | 120.35E | 17.20N | South | 45 | 48 | 46 | 6  | 1  |
| S101 | Shuiyuan117         | South Korea | 127.14E | 37.04N | North | 41 | 45 | 46 | 15 | 3  |

|       |              |             |         |        |       |    |    |    |    |    |
|-------|--------------|-------------|---------|--------|-------|----|----|----|----|----|
| S102  | Nian         | South Korea | 125.48E | 35.38N | North | 46 | 46 | 46 | 15 | 5  |
| S103  | Zhenzhu      | South Korea | 126.58E | 37.33N | North | 39 | 38 | 38 | 15 | 1  |
| S104  | Danbai       | South Korea | 126.58E | 37.33N | North | 41 | 41 | 42 | 15 | 1  |
| S105  | Andong       | South Korea | 127.48E | 35.34N | North | 37 | 41 | 42 | 15 | 1  |
| S106  | Guangchan    | South Korea | 126.58E | 37.33N | North | 40 | 44 | 41 | 1  | 1  |
| S107  | Anchan       | South Korea | 126.58E | 37.33N | North | 37 | 40 | 46 | 15 | 1  |
| S108  | Shuiyuan117  | South Korea | 127.14E | 37.04N | North | 42 | 44 | 45 | 15 | 1  |
| S109  | Rucheng      | South Korea | 127.34E | 36.05N | North | 47 | 44 | 46 | 15 | 1  |
| S110  | Jinback      | South Korea | 127.07E | 34.58N | North | 41 | 44 | 47 | 15 | 1  |
| S111  | Yeju-1       | South Korea | 127.32E | 37.14N | North | 40 | 43 | 44 | 15 | 7  |
| S112  | 84013        | Thailand    | 99.10E  | 18.34N | South | 53 | 60 | 49 | 1  | 1  |
| S113  | MK60         | Thailand    | 100.33E | 18.19N | South | 47 | 61 | 47 | 1  | 5  |
| S114  | Boder Racet  | Thailand    | 100.31E | 13.45N | South | 84 | 92 | 75 | 1  | 1  |
| S115* | 393-3Bo      | Thailand    | 101.01E | 15.53N | South | 46 | 52 | 47 | 15 | 4  |
| S116  | MKS-II-82266 | Thailand    | 100.31E | 13.45N | South | 72 | 82 | 63 | 1  | 4  |
| S117  | Boder Racet  | Thailand    | 100.31E | 13.45N | South | 46 | 56 | 47 | 1  | 8  |
| S118  | VIR 80       | Uzbekistan  | 69.13E  | 41.16N | North | 41 | 41 | 38 | 15 | 1  |
| S119  | VIR 825      | Uzbekistan  | 69.13E  | 41.16N | North | 42 | 52 | 41 | 15 | 1  |
| S120  | VIR 896      | Uzbekistan  | 69.13E  | 41.16N | North | 41 | 34 | 39 | 15 | 1  |
| S121  | Tashigan122  | Uzbekistan  | 69.13E  | 41.16N | North | 44 | 50 | 51 | 15 | 1  |
| S122  | Heizhima     | Vietnam     | 103.53E | 21.57N | South | 44 | 51 | 47 | 14 | 1  |
| S123  | Heizhima     | Vietnam     | 105.58E | 21.48N | South | 41 | 44 | 47 | 1  | 1  |
| S124  | Zhima21      | Vietnam     | 105.51E | 21.02N | South | 50 | 45 | 46 | 1  | 8  |
| S125  | Zhima20      | Vietnam     | 106.03E | 17.52N | South | 44 | 46 | 46 | 15 | 10 |
| S126  | Zhima12      | Vietnam     | 107.51E | 11.26N | South | 65 | 85 | 66 | 1  | 9  |
| S127  | Zhima35      | Vietnam     | 108.31E | 12.19N | South | 66 | 81 | 65 | 1  | 9  |

|      |          |         |         |        |       |    |    |    |    |    |
|------|----------|---------|---------|--------|-------|----|----|----|----|----|
| S128 | Zhima52  | Vietnam | 107.37E | 11.08N | South | 67 | 86 | 69 | 1  | 8  |
| S129 | Zhima105 | Vietnam | 107.54E | 13.56N | South | 53 | 61 | 53 | 1  | 3  |
| S130 | Zhima30  | Vietnam | 105.01E | 21.14N | South | 46 | 52 | 48 | 1  | 9  |
| S131 | Zhima40  | Vietnam | 106.51E | 21.27N | South | 42 | 40 | 41 | 15 | 3  |
| S132 | Zhima    | Vietnam | 106.11E | 17.47N | South | 44 | 55 | 48 | 1  | 11 |

---

\*: Accessions that *SiCOL1* and *SiCOL2* were sequenced.

**Table S4 Primers used in the qRT-PCR.**

| Type    | Species            | Gene            | Primer name        | Sequence              |
|---------|--------------------|-----------------|--------------------|-----------------------|
| qRT-PCR | sesame             | <i>SiCOL1</i>   | SiCOL1-F           | AACGCTGACGGAGTC       |
|         |                    |                 | SiCOL1-R           | CTTGATTGTAGGGTTGTAT   |
|         |                    | <i>SiCOL2</i>   | SiCOL2-F           | GCTCTTTGGTGGAACG      |
|         |                    |                 | SiCOL2-R           | CGCTGTCGCTGTAATG      |
|         |                    | <i>SiFT</i>     | SiFT-F             | AGAAGTGAGCAATGGGTG    |
|         |                    |                 | SiFT-R             | AAGAAGGTGCCGAGGT      |
|         |                    | <i>Siactin7</i> | Siactin7-F         | CTGTCAACAGAATTGGGTG   |
|         | Siactin7-R         |                 | GCAACTGGGATGATATGG |                       |
|         | <i>Arabidopsis</i> | <i>CO</i>       | CO-F               | ATTTCGTGCTGGTTGA      |
|         |                    |                 | CO-R               | GGGACTAAGAAGGCTAT     |
|         |                    | <i>FT</i>       | FT-F               | CCCTGCTACAACCTGGAA    |
|         |                    |                 | FT-R               | CAAGCTGTCGAAACAATAT   |
|         |                    | <i>actin</i>    | actin-F            | CCCGCTATGTATGTCGCCA   |
|         |                    |                 | actin-R            | AACCCTCGTAGATTGGCACAG |
| PCR     |                    | sesame          | <i>SiCOL1</i>      | SiCOL1-F              |
|         | SiCOL1-R           |                 |                    | CAAATCCCGACCTCTT      |
|         | <i>SiCOL2</i>      |                 | SiCOL2-F           | TCTTGCCATCTGTCGT      |
|         |                    |                 | SiCOL2-R           | CTTGGTCCAACCATTT      |
